# Supplementary material
Source: PubMed Central journal article supplement (PMC10992864)
Supplement: 262_2021_3059_MOESM1_ESM.pdf [file 262_2021_3059_MOESM1_ESM.pdf]

### KEGG Pathways, LY2

10Gy d3 vs. 0Gy ctrl

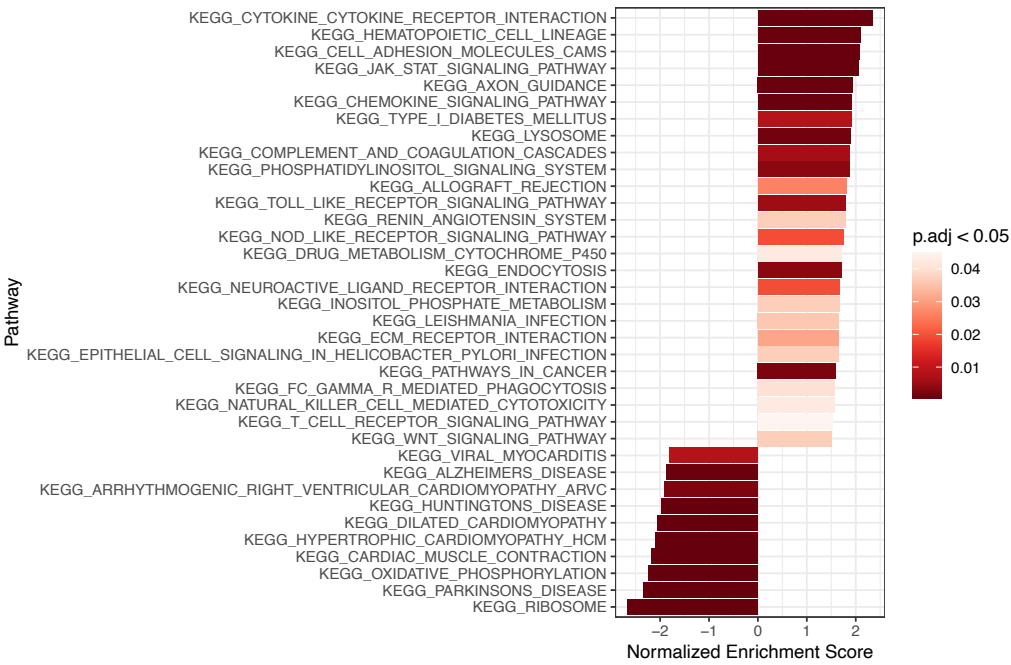

### SUPPLEMENTAL FIGURE 1 | KEGG Pathways for LY2 tumors 10Gy d3 versus 0Gy Ctrl

(A) Waterfall plot depicting all significant KEGG pathways for RNA-Seq expression data in LY2 tumors harvested 3 days post-RT (10Gy) versus 0Gy controls. Shaded by adjusted p value for multiple comparisons.

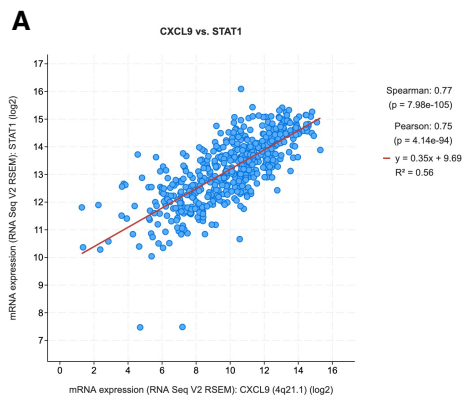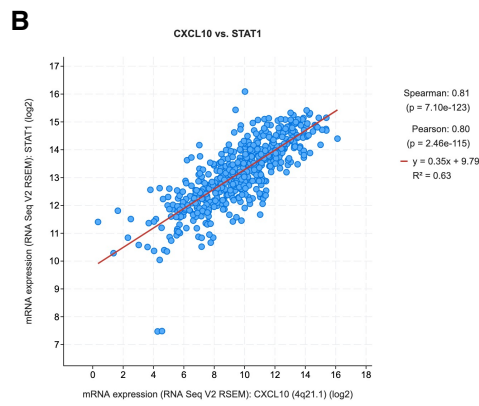

**C** TCGA HNSCC CXCL9 correlates

| Correlated Gene | Cytoband      | Spearman's Correlation | p-Value          | q-Value ▲        |
|-----------------|---------------|------------------------|------------------|------------------|
| CXCL10          | 4q21.1        | 0.859                  | 2.59e-153        | <b>5.22e-149</b> |
| IDO1            | 8p11.21       | 0.837                  | 1.51e-138        | <b>1.52e-134</b> |
| GBP4            | 1p22.2        | 0.834                  | 2.97e-136        | <b>2.00e-132</b> |
| CXCR2P1         | 2q35          | 0.825                  | 3.88e-131        | <b>1.96e-127</b> |
| IFNG            | 12q15         | 0.825                  | 5.32e-131        | <b>2.15e-127</b> |
| GBP5            | 1p22.2        | 0.821                  | 6.46e-129        | <b>2.17e-125</b> |
| CXCL11          | 4q21.1        | 0.817                  | 1.15e-126        | <b>3.32e-123</b> |
| CD8A            | 2p11.2        | 0.815                  | 2.72e-125        | <b>6.86e-122</b> |
| GBP1            | 1p22.2        | 0.809                  | 2.37e-122        | <b>5.31e-119</b> |
| SLA2            | 20q11.23      | 0.799                  | 9.04e-117        | <b>1.83e-113</b> |
| IL12RB1         | 19p13.11      | 0.791                  | 4.52e-113        | <b>8.31e-110</b> |
| FASLG           | 1q24.3        | 0.788                  | 2.11e-111        | <b>3.55e-108</b> |
| SIRPG           | 20p13         | 0.780                  | 5.96e-108        | <b>9.26e-105</b> |
| PDCD1           | 2q37.3        | 0.778                  | 3.41e-107        | <b>4.65e-104</b> |
| APOL6           | 22q12.3       | 0.778                  | 3.45e-107        | <b>4.65e-104</b> |
| GZMB            | 14q12         | 0.778                  | 5.08e-107        | <b>6.42e-104</b> |
| TIGIT           | 3q13.31       | 0.777                  | 1.21e-106        | <b>1.43e-103</b> |
| IL18BP          | 11q13.4       | 0.775                  | 1.02e-105        | <b>1.14e-102</b> |
| CITA            | 16p13.13      | 0.775                  | 1.07e-105        | <b>1.14e-102</b> |
| CXCR6           | 3p21.31       | 0.774                  | 3.01e-105        | <b>3.04e-102</b> |
| <b>STAT1</b>    | <b>2q32.2</b> | <b>0.773</b>           | <b>7.98e-105</b> | <b>7.67e-102</b> |
| TBX21           | 17q21.32      | 0.772                  | 3.07e-104        | <b>2.82e-101</b> |
| CXCR3           | Xq13.1        | 0.770                  | 2.24e-103        | <b>1.96e-100</b> |
| JAKMIP1         | 4p16.1        | 0.769                  | 2.68e-103        | <b>2.26e-100</b> |
| NRG7            | 19q13.41      | 0.769                  | 4.93e-103        | <b>3.98e-100</b> |

**D** TCGA HNSCC CXCL10 correlates

| Correlated Gene | Cytoband      | Spearman's Correlation | p-Value          | q-Value ▲        |
|-----------------|---------------|------------------------|------------------|------------------|
| CXCL11          | 4q21.1        | 0.947                  | 1.27e-257        | <b>2.57e-253</b> |
| CXCL9           | 4q21.1        | 0.859                  | 2.59e-153        | <b>2.61e-149</b> |
| GBP1            | 1p22.2        | 0.858                  | 1.13e-152        | <b>7.61e-149</b> |
| TAP1            | 6p21.32       | 0.834                  | 1.49e-136        | <b>7.51e-133</b> |
| IDO1            | 8p11.21       | 0.830                  | 1.19e-133        | <b>4.80e-130</b> |
| GBP4            | 1p22.2        | 0.811                  | 2.76e-123        | <b>9.30e-120</b> |
| <b>STAT1</b>    | <b>2q32.2</b> | <b>0.810</b>           | <b>7.10e-123</b> | <b>2.05e-119</b> |
| GBP5            | 1p22.2        | 0.810                  | 2.25e-122        | <b>5.68e-119</b> |
| IRF1            | 5q31.1        | 0.809                  | 7.25e-122        | <b>1.63e-118</b> |
| TRIM22          | 11p15.4       | 0.800                  | 2.22e-117        | <b>4.48e-114</b> |
| APOL3           | 22q12.3       | 0.798                  | 1.09e-116        | <b>2.01e-113</b> |
| ETV7            | 6p21.31       | 0.798                  | 1.41e-116        | <b>2.29e-113</b> |
| IFNG            | 12q15         | 0.798                  | 1.47e-116        | <b>2.29e-113</b> |
| LAP3            | 4p15.32       | 0.796                  | 2.15e-115        | <b>3.10e-112</b> |
| GZMB            | 14q12         | 0.780                  | 3.69e-108        | <b>4.95e-105</b> |
| BATF2           | 11q13.1       | 0.780                  | 7.97e-108        | <b>9.83e-105</b> |
| CXCR2P1         | 2q35          | 0.780                  | 8.27e-108        | <b>9.83e-105</b> |
| LAG3            | 12p13.31      | 0.779                  | 2.23e-107        | <b>2.50e-104</b> |
| LGALS17A        | 19q13.2       | 0.776                  | 4.14e-106        | <b>4.40e-103</b> |
| PSMB9           | 6p21.32       | 0.774                  | 2.75e-105        | <b>2.78e-102</b> |
| APOL6           | 22q12.3       | 0.767                  | 4.41e-102        | <b>4.24e-99</b>  |
| UBE2L6          | 11q12.1       | 0.760                  | 2.07e-99         | <b>1.90e-96</b>  |
| WARS            | 14q32.2       | 0.748                  | 1.43e-94         | <b>1.26e-91</b>  |
| IL12RB1         | 19p13.11      | 0.748                  | 1.93e-94         | <b>1.62e-91</b>  |
| EPST11          | 13q14.11      | 0.747                  | 2.92e-94         | <b>2.36e-91</b>  |

**SUPPLEMENTAL FIGURE 2 | TCGA HNSCC STAT1, CXCL9, CXCL10**

(A) Correlation of gene expression between CXCL9 and STAT1 and (B) correlation of gene expression between CXCL10 and STAT1. (C) Top correlates of CXCL9 and (D) CXCL10, with most highly correlated STAT family member indicated. Taken from cBioportal.

| HGNC symbols | MGI symbols |
|--------------|-------------|
| IFI27        | Ifi27       |
| IRF7         | Irf7        |
| USP18        | Usp18       |
| BST2         | Bst2        |
| CXCL10       | Cxcl10      |
| DDX60        | Ddx60       |
| HERC6        | Herc6       |
| HLA-B        |             |
| HLA-G        |             |
| IFI35        | Ifi35       |
| IFI44        | Ifi44       |
| IFI44L       | Ifi44l      |
| IFIT1        | Ifit1       |
| IFIT3        | Ifit3       |
| ISG15        | Isg15       |
| LGALS3BP     | Lgals3bp    |
| LY6E         | Ly6e        |
| MX1          | Mx2         |
| MX2          | Mx1         |
| OAS3         | Oas3        |
| OASL         | Oasl1       |
| PLSCR1       | Plscr1      |
| STAT1        | Stat1       |
| TRIM14       | Trim14      |
| HSD17B1      | Hsd17b1     |
| OAS1         | Oas1a       |
| CA2          | Car2        |
| CCNA1        | Ccna1       |
| CXCL1        | Cxcl1       |
| GALC         | Galc        |
| IFI6         |             |
| IFITM1       | Ifitm1      |
| LAMP3        | Lamp3       |
| MCL1         | Mcl1        |
| ROBO1        | Robo1       |
| SLC6A15      | Slc6a15     |
| THBS1        | Thbs1       |
| TIMP3        | Timp3       |

### SUPPLEMENTAL FIGURE 3

Manually curated list of predicted orthologous equivalents in mouse of the human gene signature used in Figure 3D.

Cancer Immunology, Immunotherapy (submitted in 2021) - Michael Knitz et al.

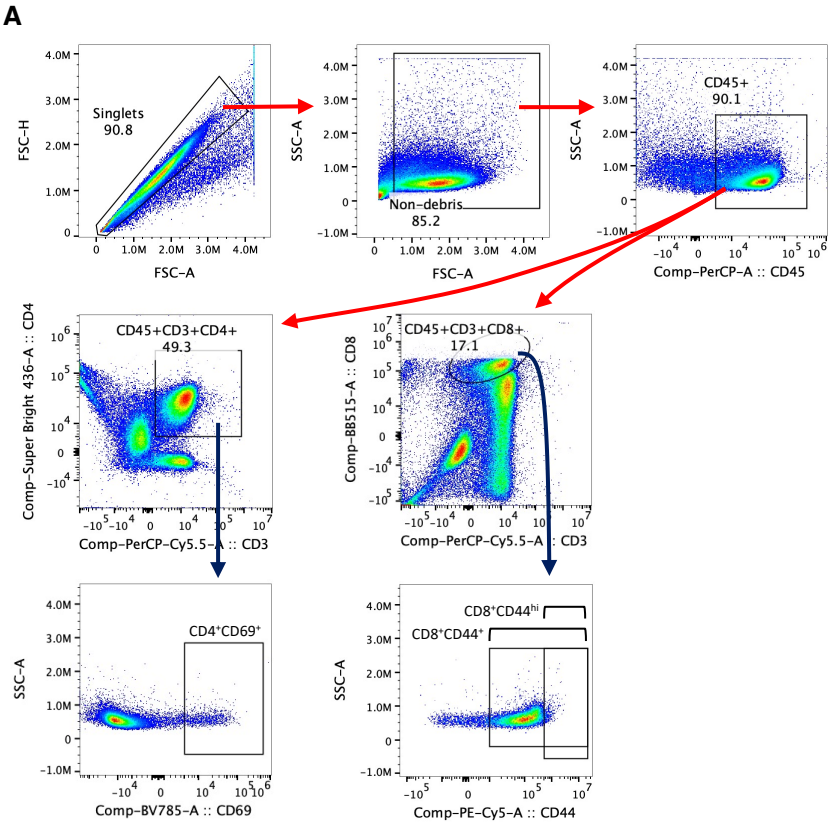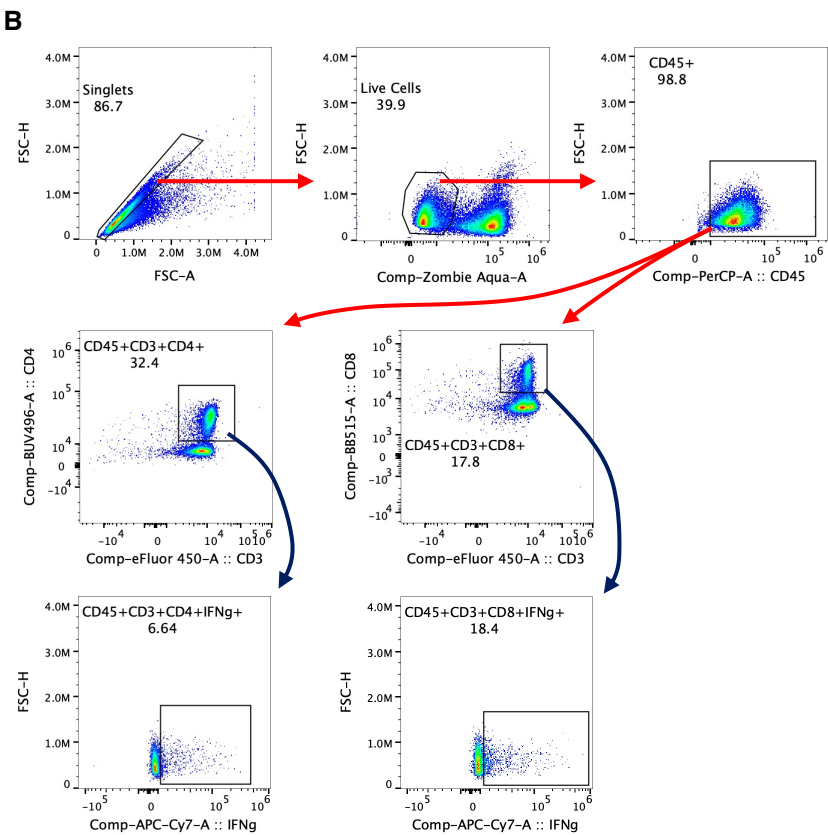

**SUPPLEMENTAL FIGURE 4**

Representative flow cytometry gating used for manually gated populations depicted in Figure 4E and 4J. (A) Gating strategy used for events collected from tumor-draining lymph nodes from mice bearing LY2 STAT1 KO tumors or LY2 PX458 Ctrl tumors. (B) Gating strategy used for events collected from tumor-draining lymph nodes from mice bearing MOC2 STAT1 KO tumors or MOC2 PX458 Ctrl tumors.
